# Supplementary material for: Kinesin-binding–triggered conformation switching of microtubules contributes to polarized transport
Source: PubMed Central journal article supplement — J Cell Biol. 2018 Dec 3;217(12):4164–83. doi: 10.1083/jcb.201711178 (PMC6279379; doi:10.1083/jcb.201711178), 2018-12-03
Supplement: JCB_201711178_sm.pdf [file JCB_201711178_sm.pdf]

## Supplemental material

Shima et al., <https://doi.org/10.1083/jcb.201711178>

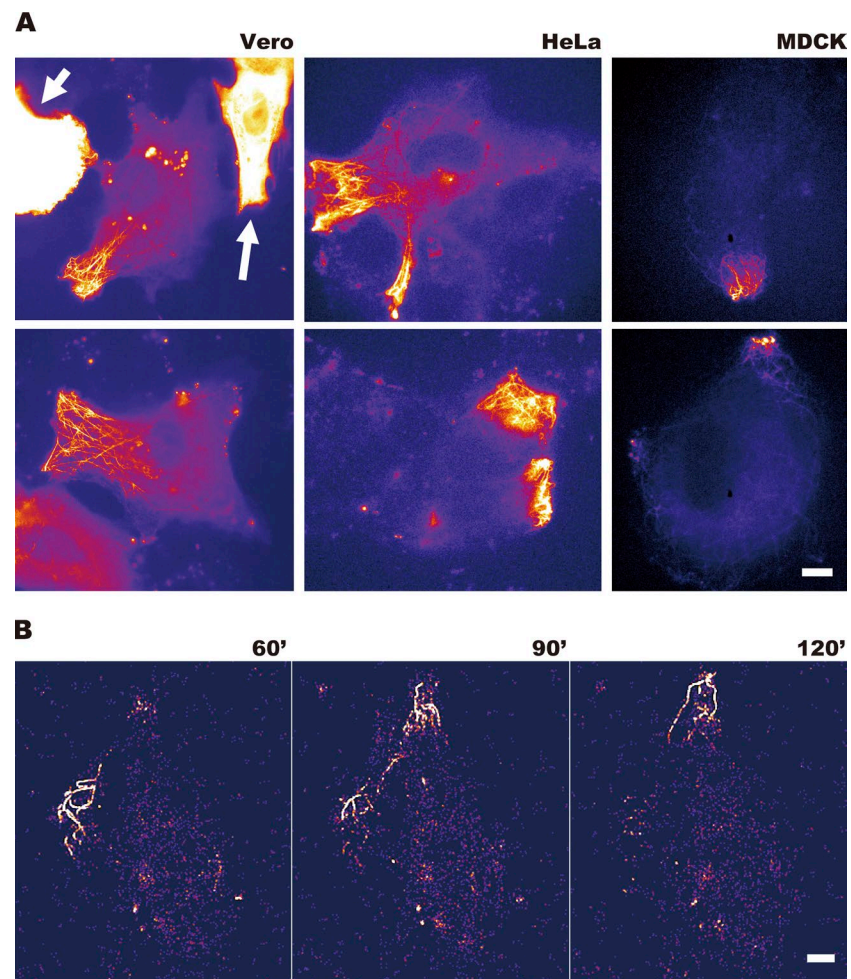

Figure S1. **Stochastic and transient asymmetric distribution of kinesin in nonneuronal cells.** (A) Asymmetric distribution of GFP-tagged KIF5C dimeric motor domain (aa 1–560) in various cells (Vero, MDCK, and HeLa). Only cells with low expression level of GFP-KIF5C were analyzed, so that the signals from the overexpressing cells are saturated in this presentation (arrows). Images are shown with pseudocolor (“Fire” lookup table of ImageJ) to illustrate the asymmetric distribution. Bar, 10  $\mu$ m. (B) Total internal reflection fluorescence live-cell imaging of a HeLa cell expressing GFP-KIF5C. KIF5C asymmetrically distributes in the cell, and only a small subset of microtubules are heavily decorated with KIF5C. The accumulation of KIF5C, however, stochastically switches within  $\sim$ 1 h. Pseudocolored SD maps at 60, 90, and 120 min are shown. Bar, 10  $\mu$ m.

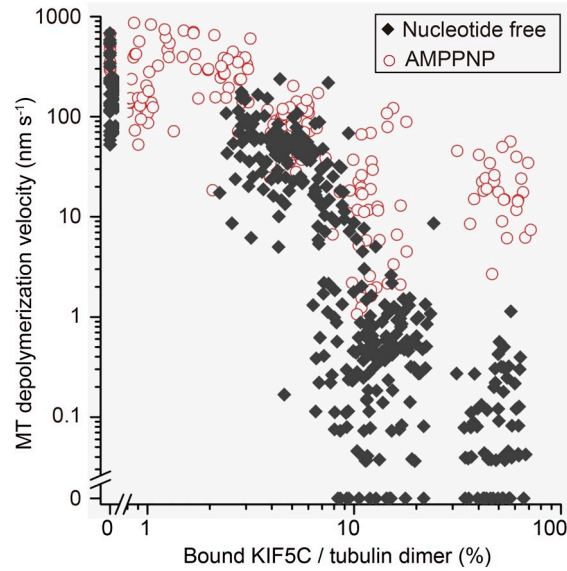

Figure S2. **Hyperstabilization of GDP microtubules by KIF5C.** KIF5C inhibited depolymerization of GDP microtubules (MT). The depolymerization velocity was sensitive to the nucleotide condition of KIF5C when more than 10% of the tubulin dimer was occupied by KIF5C. The number of KIF5C molecules bound on a microtubule was measured using the fluorescent intensity of KIF5C–DY647. See also Video 2.

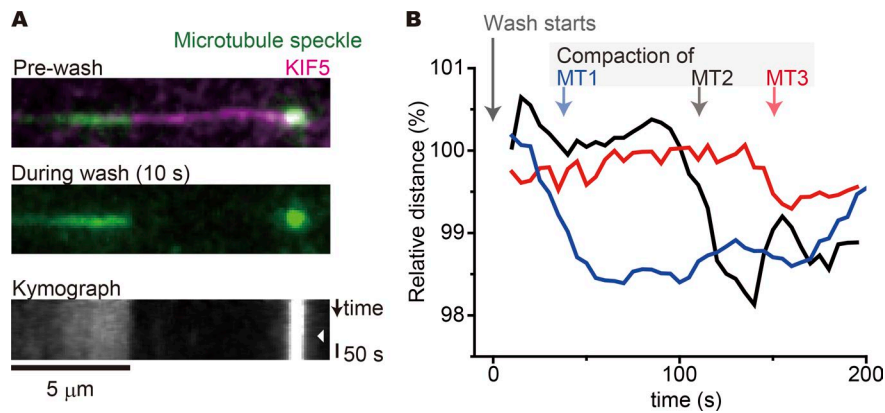

Figure S3. **Compaction of the elongated GDP microtubule.** (A) Images of fluorescent speckles on GDP microtubules (green) and KIF5C (magenta). Before the washout process, KIF5C bound throughout the microtubule (top panel), while KIF5C was washed out in less than 10 s of the washout process (middle panel). The bottom panel shows a kymograph of the speckles during the washout process. The distance between the speckles was shortened at 150 s after initiating the washout process (arrowhead). (B) The relative distances between the speckles after initiation of the KIF5C washout. The distances were shortened at 40–150 s, suggesting that GDP microtubules keep the KIF5C-induced elongated form for a while after KIF5C dissociation.

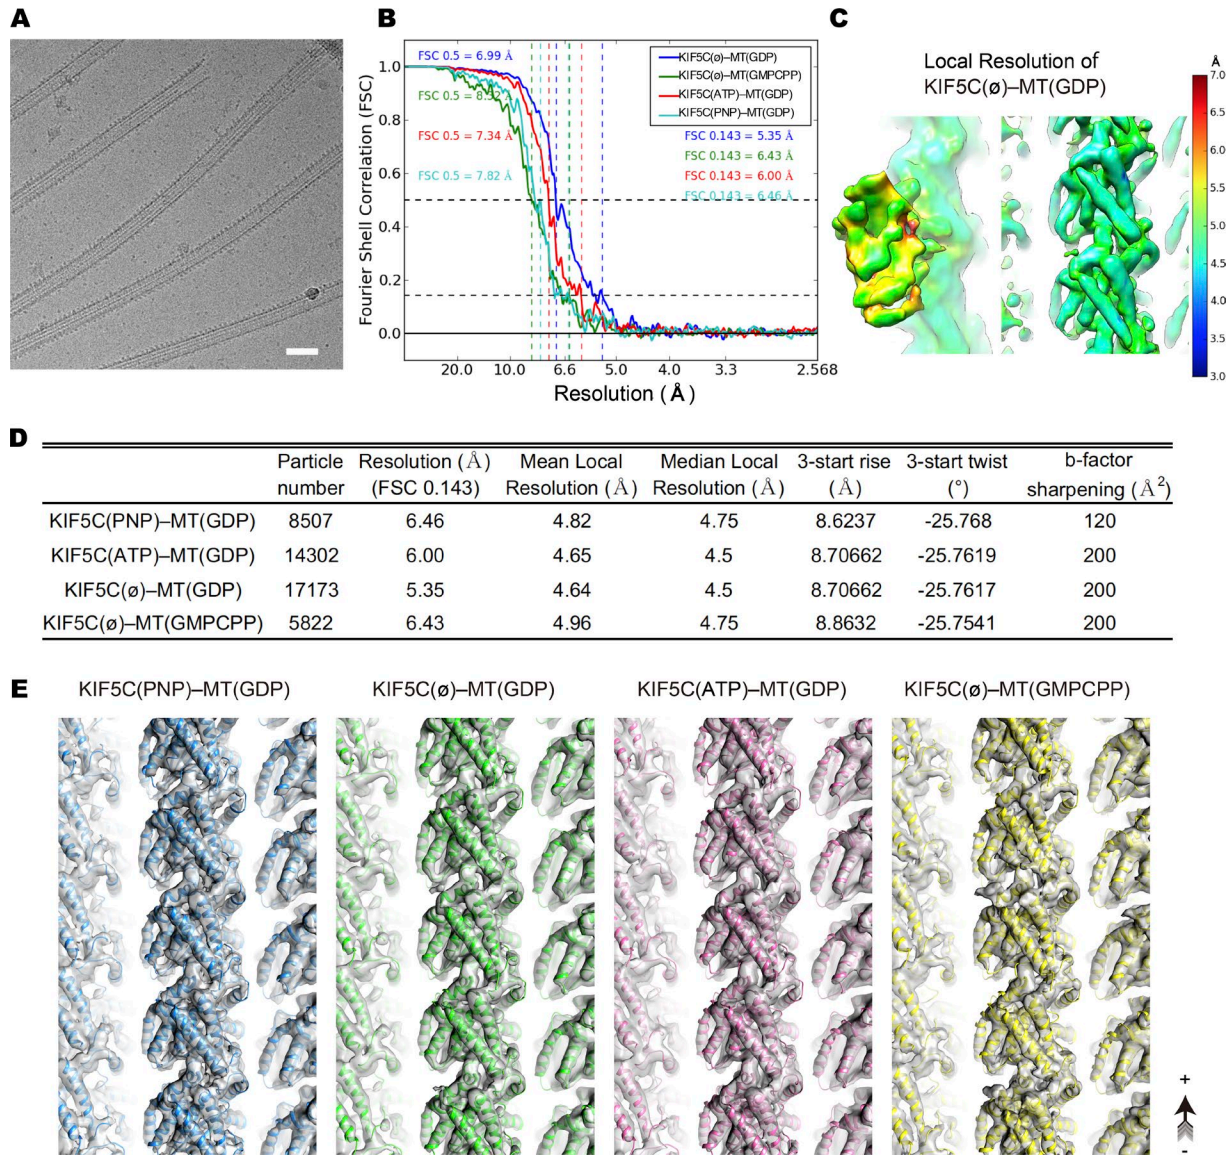

Figure S4. **Resolution and statistics for the cryo-EM reconstructions.** (A) Example micrograph of KIF5C( $\emptyset$ )-MT(GDP). Bar, 50 nm. (B) Fourier shell correlation curves of the four KIF5C-MT reconstructions. (C) Example local resolution estimation of KIF5C( $\emptyset$ )-MT(GDP) calculated by ResMap. (D) Image data processing statistics and helical parameters for the reconstructions. (E) The electron density maps and docked atomic models of the four KIF5C-MT complexes.

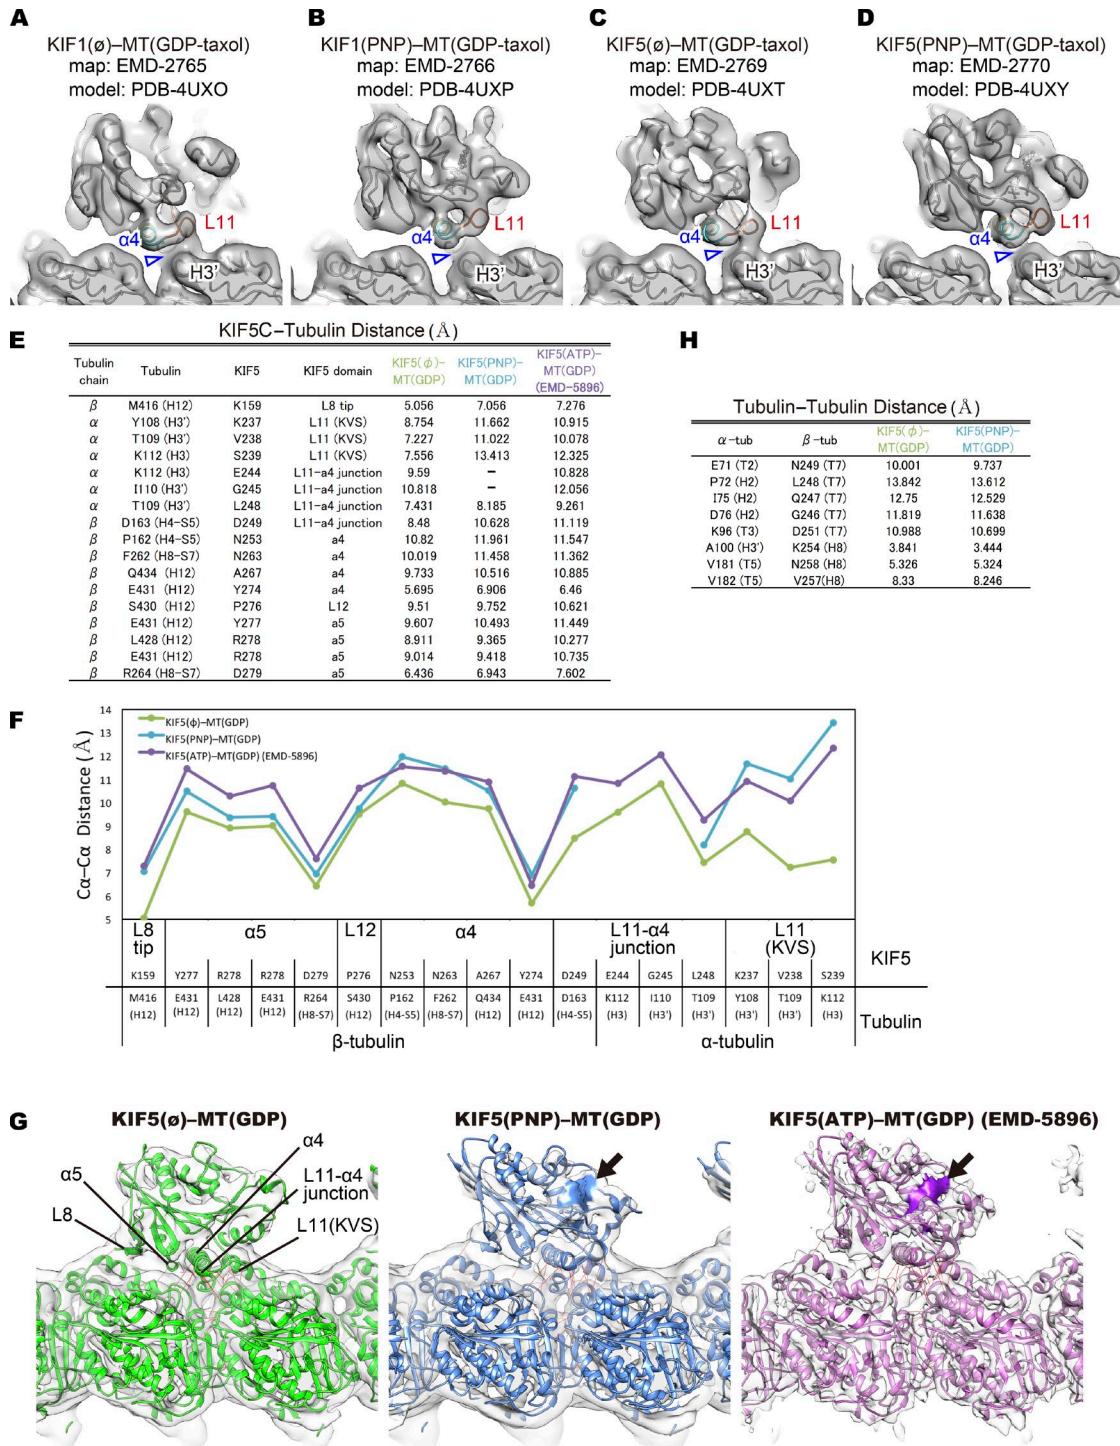

Figure S5. **Position of the elements of a kinesin-microtubule surface.** (A–D) The conformations of the L11- $\alpha$ 4 junction of KIF1A (A and B) and KIF5C (C and D) reconstructed from the previous report (Atherton et al., 2014). The loop L11 and the following first turn of helix  $\alpha$ 4 do not change their conformations much with the nucleotide states in KIF1A (A and B). The L11- $\alpha$ 4 junction region (cyan) is separate from the  $\alpha$ -tubulin remarkably (arrowheads). The corresponding region of KIF5C takes a similar conformation on the GDP-Taxol microtubule (C and D). EMD, Electron Microscopy Data Bank; PDB, Protein Data Bank. (E and F) The Ca-Ca distances of KIF5 and tubulins in the KIF5( $\emptyset$ )-MT(GDP) and KIF5(PNP)-MT(GDP) structures reported here and the KIF5(ATP)-MT(GDP) (EMD-5896) structures previously reported by Alushin et al. (2014). For KIF5(ATP)-MT(GDP) docking, we rigidly fit 4HNA and 4LNU into KIF5 and microtubule densities, respectively. Comparing KIF5( $\emptyset$ )-MT(GDP) and KIF5(PNP)-MT(GDP), the tubulin and KIF5 interface elements (L8 tip,  $\alpha$ 5, L12,  $\alpha$ 4, L11- $\alpha$ 4 junction, and L11 [KVS]) are closer in KIF5( $\emptyset$ )-MT(GDP) (green and blue lines in F), suggesting the interactions in KIF5( $\emptyset$ )-MT(GDP) are strong to rotate tubulins and elongate microtubules (MT). Those elements in KIF5(ATP)-MT(GDP) were similar to KIF5(PNP)-MT(GDP), especially in the L11 and  $\alpha$ 4 (purple and blue lines in F). (G) Side view of the three KIF5-MT complex structures for the distance measurements in E and F. KIF5(ATP)-MT(GDP) seems to contain a nucleotide (arrow) in the nucleotide-binding pocket. (H) The Ca-Ca distances for  $\alpha$ - and  $\beta$ -tubulins in the KIF5( $\emptyset$ )-MT(GDP) and KIF5(PNP)-MT(GDP) structures.

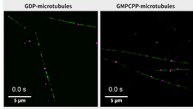

Video 1. **KIF5C dimer molecules (magenta) moving along GDP and GMPCPP microtubules (green).** Playback speed is 10×.

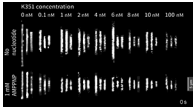

Video 2. **Depolymerization kinetics of GDP microtubules in the presence of KIF5C monomer (K351).** Three microtubule images are placed for each condition. Playback speed is 10×.

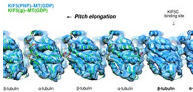

Video 3. **Comparison of the microtubule lattices between KIF5C(PNP)-MT(GDP) and KIF5C(σ)-MT(GDP).** Frame rate, 25 FPS.

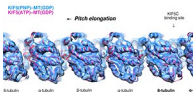

Video 4. **Comparison of the microtubule lattices between KIF5C(PNP)-MT(GDP) and KIF5C(ATP)-MT(GDP).** Frame rate, 25 FPS.

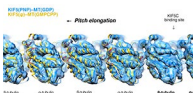

Video 5. **Comparison of the microtubule lattices between KIF5C(PNP)-MT(GDP) and KIF5C(σ)-MT(GMPCPP).** Frame rate, 25 FPS.

Table S1. **Sample and event numbers for Fig. 1(G-L)**

| Microtubule type | GDP        |          |             | GMPCPP     |          |             |
|------------------|------------|----------|-------------|------------|----------|-------------|
|                  | KIF5C (nM) | $N_{MT}$ | $N_{event}$ | KIF5C (nM) | $N_{MT}$ | $N_{event}$ |
| KIF5C (nM)       | 0.12       | 1.2      | 12          | 0.12       | 1.2      | 12          |
| $N_{MT}$         | 83         | 65       | 61          | 60         | 56       | 54          |
| $N_{event}$      | 37         | 119      | 252         | 40         | 82       | 125         |

Table S2. **Statistics for the mixed Gaussian fitting in Fig. 1(G-I)**

| Microtubule type | KIF5C (nM) | BIC               |                   |       | First component |                    |                    | Second component |       |          |
|------------------|------------|-------------------|-------------------|-------|-----------------|--------------------|--------------------|------------------|-------|----------|
|                  |            | G = 1             | G = 2             | G = 3 | $\lambda$       | $\mu$              | $\sigma$           | $\lambda$        | $\mu$ | $\sigma$ |
| GDP              | 0.12       | -321              | -622 <sup>a</sup> | -622  | 0.35            | $5 \times 10^{-5}$ | $3 \times 10^{-5}$ | 0.65             | 0.05  | 0.03     |
|                  | 1.2        | -208              | -260 <sup>a</sup> | -252  | 0.46            | 0.01               | 0.008              | 0.54             | 0.09  | 0.05     |
|                  | 12         | -217 <sup>a</sup> | -213              | NE    | NA              | 0.09               | 0.04               | NA               | NA    | NA       |
| GMPCPP           | 0.12       | -137 <sup>a</sup> | -131              | NE    | NA              | 0.12               | 0.06               | NA               | NA    | NA       |
|                  | 1.2        | -182 <sup>a</sup> | -181              | -172  | NA              | 0.09               | 0.04               | NA               | NA    | NA       |
|                  | 12         | -203 <sup>a</sup> | -199              | NE    | NA              | 0.1                | 0.03               | NA               | NA    | NA       |

BIC, Bayesian information criteria.  $\lambda$ , proportion;  $\mu$ , mean;  $\sigma$ , SD of the Gaussian function. NE, not examined; NA, not applicable.

<sup>a</sup>The model with minimum Bayesian information criteria was chosen as the best fit.

Table S3. **Effects of increased KIF5C concentration on the motility-related parameters**

|                            | GDP microtubule    |                                    |                                   | GMPCPP microtubule                |                                   |                  |
|----------------------------|--------------------|------------------------------------|-----------------------------------|-----------------------------------|-----------------------------------|------------------|
|                            | 0.12 nM vs. 1.2 nM | 0.12 nM vs. 12 nM                  | 1.2 nM vs. 12 nM                  | 0.12 nM vs. 1.2 nM                | 0.12 nM vs. 12 nM                 | 1.2 nM vs. 12 nM |
| Landing rate (Fig. 1, G-I) | 1.3 ± 0.1 (0.014)  | 3.2 ± 0.1 (8 × 10 <sup>-11</sup> ) | 2.4 ± 0.2 (0.0013)                | 0.9 ± 0.4 (0.1)                   | 1.0 ± 0.4 (0.47)                  | 1.1 ± 0.3 (0.46) |
| Off rate (Fig. 1 J)        | 1.0 ± 0.1 (0.999)  | 1.0 ± 0.2 (0.85)                   | 1.0 ± 0.2 (0.69)                  | 1.3 ± 0.2 (5 × 10 <sup>-5</sup> ) | 1.4 ± 0.4 (2 × 10 <sup>-4</sup> ) | 1.0 ± 0.1 (0.93) |
| Velocity (Fig. 1 K)        | 1.1 ± 0.2 (0.004)  | 1.4 ± 0.1 (2 × 10 <sup>-7</sup> )  | 1.2 ± 0.4 (5 × 10 <sup>-9</sup> ) | 1.0 ± 0.2 (0.85)                  | 1.2 ± 0.1 (0.50)                  | 1.2 ± 0.1 (0.21) |
| Run length (Fig. 1 L)      | 1.0 ± 0.1 (0.35)   | 1.3 ± 0.1 (0.01)                   | 1.2 ± 0.1 (0.07)                  | 1.0 ± 0.2 (0.999)                 | 0.9 ± 0.2 (0.99)                  | 0.9 ± 0.2 (0.96) |

Results of multiple comparisons by Steel–Dwass test are presented as a ratio of the median values ± SEM (P value).

Table S4. **Number of microtubules and kinesin observed for Fig. 2**

| KIF5C (M)         | Wild-type KIF5C |              | Wild-type KIF5C |          | Wild-type KIF5C | L11 mutant KIF5C |            |
|-------------------|-----------------|--------------|-----------------|----------|-----------------|------------------|------------|
|                   | Nucleotide-free |              | 1 mM AMPPNP     |          | Nucleotide-free | Nucleotide-free  |            |
|                   | GDP             | GMPCPP       | GDP             | GMPCPP   | Taxol           | GDP              | GMPCPP     |
| 10 <sup>-12</sup> | 170 (4)         | 57 (5)       | NE              | NE       | 217 (0)         | 24 (2)           | 19 (2)     |
| 10 <sup>-11</sup> | 308 (15)        | 128 (47)     | 62 (3)          | 62 (4)   | 116 (30)        | 32 (5)           | 20 (4)     |
| 10 <sup>-10</sup> | 144 (212)       | 53 (137)     | 62 (11)         | 61 (8)   | 98 (49)         | 28 (40)          | 30 (46)    |
| 10 <sup>-9</sup>  | 223 (3,687)     | 65 (1266)    | 105 (172)       | 60 (91)  | 121 (422)       | 29 (398)         | 26 (355)   |
| 10 <sup>-8</sup>  | 160 (28,341)    | 124 (14,026) | 57 (347)        | 71 (768) | 154 (837)       | 38 (8,370)       | 18 (4,522) |
| 10 <sup>-7</sup>  | NE              | NE           | 55 (1,200)      | 59 (958) | NE              | NE               | NE         |

The data are represented as the number of microtubules (the number of bound KIF5C molecules). NE, not examined.

Table S5. **Statistics for the mixed Gaussian fitting in Fig. 2 B**

| Microtubule type | KIF5C  | BIC                |                    |       | First component |                      |                      | Second component |      |      |
|------------------|--------|--------------------|--------------------|-------|-----------------|----------------------|----------------------|------------------|------|------|
|                  |        | G = 1              | G = 2              | G = 3 | λ               | μ                    | σ                    | λ                | μ    | σ    |
| GDP              | 10 pM  | -253               | -2073 <sup>a</sup> | -2130 | 0.42            | 5 × 10 <sup>-5</sup> | 3 × 10 <sup>-5</sup> | 0.58             | 0.23 | 0.14 |
|                  | 100 pM | 250                | 223 <sup>a</sup>   | 234   | 0.17            | 0.10                 | 0.06                 | 0.83             | 1.03 | 0.47 |
| GMPCPP           | 10 pM  | -82.6 <sup>a</sup> | -82.6              | -74.4 | NA              | 0.30                 | 0.17                 | NA               | NA   | NA   |
|                  | 100 pM | 129 <sup>a</sup>   | 136                | NE    | NA              | 1.69                 | 0.76                 | NA               | NA   | NA   |

BIC, Bayesian information criteria. NE, not examined; NA, not applicable.

<sup>a</sup>The model with minimum Bayesian information criteria was chosen as the best fit.

Table S6. Statistics for the mixed Gaussian fitting in Fig. 2 D

| Microtubule type | KIF5C  | BIC               |                 |       | First component |       |          | Second component |       |          |
|------------------|--------|-------------------|-----------------|-------|-----------------|-------|----------|------------------|-------|----------|
|                  |        | G = 1             | G = 2           | G = 3 | $\lambda$       | $\mu$ | $\sigma$ | $\lambda$        | $\mu$ | $\sigma$ |
| GDP              | 100 pM | -211 <sup>a</sup> | -203            | NE    | NA              | 0.174 | 0.03     | NA               | NA    | NA       |
|                  | 1 nM   | 35                | 12 <sup>a</sup> | 22    | 0.7             | 0.52  | 0.016    | 0.3              | 0.96  | 0.28     |
| GMPCPP           | 100 pM | -129 <sup>a</sup> | -129            | -124  | NA              | 0.2   | 0.07     | NA               | NA    | NA       |
|                  | 1 nM   | 11 <sup>a</sup>   | 16              | NE    | NA              | 0.56  | 0.25     | NA               | NA    | NA       |

BIC, Bayesian information criteria. NE, not examined; NA, not applicable.

<sup>a</sup>The model with minimum Bayesian information criteria was chosen as the best fit.

## References

- Alushin, G.M., G.C. Lander, E.H. Kellogg, R. Zhang, D. Baker, and E. Nogales. 2014. High-resolution microtubule structures reveal the structural transitions in  $\alpha\beta$ -tubulin upon GTP hydrolysis. *Cell*. 157:1117-1129. <https://doi.org/10.1016/j.cell.2014.03.053>
- Atherton, J., I. Farabella, I.M. Yu, S.S. Rosenfeld, A. Houdusse, M. Topf, and C.A. Moores. 2014. Conserved mechanisms of microtubule-stimulated ADP release, ATP binding, and force generation in transport kinesins. *eLife*. 3:e03680. <https://doi.org/10.7554/eLife.03680>
